# Supplementary material for: Influence of Human Eating Habits on Antimicrobial Resistance Phenomenon: Aspects of Clinical Resistome of Gut Microbiota in Omnivores, Ovolactovegetarians, and Strict Vegetarians
Source: PubMed Central journal article supplement (PMC8001852; doi:10.3390/antibiotics10030276), 2021-03-09
Supplement: antibiotics-10-00276-s001.pdf [file antibiotics-10-00276-s001.pdf]

Table S1. Resistance genetic markers screened, initiator oligonucleotides, size of expected amplicons and references.

| Marker                      | Resistance Mechanism                         | Targeted antimicrobials | Sequence (5'-3')                                                       | Amplicon (bp) | Reference |
|-----------------------------|----------------------------------------------|-------------------------|------------------------------------------------------------------------|---------------|-----------|
| <i>bla<sub>CTX-M</sub></i>  | Enzymatic inactivation ( $\beta$ -lactamase) | $\beta$ -lactams        | ATG TGC AGY ACC AGT AAA G<br>GGT CAC CAG AAG GAG C                     | 562           | [1]       |
| <i>bla<sub>KPC</sub></i>    | Enzymatic inactivation ( $\beta$ -lactamase) | $\beta$ -lactams        | ATG TCA CTG TAT CGC CGT CT<br>TTT TCA GAG CCT TAC TGC CC               | 892           | [1]       |
| <i>bla<sub>SHV</sub></i>    | Enzymatic inactivation ( $\beta$ -lactamase) | $\beta$ -lactams        | CTT TAC TCG CCT TTA TCG GC<br>TTA CCG ACC GGC ATC TTT CC               | 982           | [1]       |
| <i>bla<sub>TEM</sub></i>    | Enzymatic inactivation ( $\beta$ -lactamase) | $\beta$ -lactams        | GTG CGC GGA ACC CCT ATT<br>TTA CCA ATG CTT AAT CAG TGA GGC             | 968           | [1]       |
| <i>bla<sub>OXA-23</sub></i> | Enzymatic inactivation ( $\beta$ -lactamase) | $\beta$ -lactams        | GAT CGG ATT GGA GAA CCA GA<br>ATT TCT GAC CGC ATT TCC AT               | 501           | [2]       |
| <i>bla<sub>OXA-51</sub></i> | Enzymatic inactivation ( $\beta$ -lactamase) | $\beta$ -lactams        | TAA TGC TTT GAT CGG CCT TG<br>TGG ATT GCA CTT CAT CTT GG               | 353           | [2]       |
| <i>bla<sub>Z</sub></i>      | Enzymatic inactivation ( $\beta$ -lactamase) | $\beta$ -lactams        | ACT TCA ACA CCT GCT GCT TTC<br>TGA CCA CTT TTA TCA GCA ACC             | 173           | [3]       |
| <i>amp<sub>C</sub></i>      | Enzymatic inactivation ( $\beta$ -lactamase) | $\beta$ -lactams        | CTG TTC GAG ATC GGC TC<br>CGG TAT AGG TCG CGA G                        | 166           | [4]       |
| <i>bla<sub>SPM-1</sub></i>  | Enzymatic inactivation ( $\beta$ -lactamase) | $\beta$ -lactams        | CCT ACA ATC TAA CGG CGA CC<br>TCG CCG TGT CCA GGT ATA AC               | 649           | [5]       |
| <i>mecA</i>                 | Modified target site                         | $\beta$ -lactams        | GTA GAA ATG ACT GAA CGT CCG ATA A<br>CCA ATT CCA CAT TGT TTC GGT CTA A | 310           | [6]       |

Table S1. Continuation.

| Marker        | Resistance Mechanism | Targeted antimicrobials         | Sequence (5'-3')                                           | Amplicon (bp) | Reference |
|---------------|----------------------|---------------------------------|------------------------------------------------------------|---------------|-----------|
| <i>tet(A)</i> | Efflux pump          | Tetracyclines                   | GCT ACA TCC TGC TTG CCT TC<br>CAT AGA TCG CCG TGA AGA GG   | 210           | [7]       |
| <i>tet(B)</i> | Efflux pump          | Tetracyclines                   | TTG GTT AGG GGC AAG TTT TG<br>GTA ATG GGC CAA TAA CAC CG   | 659           | [7]       |
| <i>tet(E)</i> | Efflux pump          | Tetracyclines                   | AAA CCA CAT CCT CCA TAC GC<br>AAA TAG GCC ACA ACC GTC AG   | 278           | [7]       |
| <i>tet(K)</i> | Efflux pump          | Tetracyclines                   | GTA GCG ACA ATA GGT AAT AGT<br>GTA GTG ACA ATA AAC CTC CTA | 360           | [8]       |
| <i>tet(L)</i> | Efflux pump          | Tetracyclines                   | TCG TTA GCG TGC TGT CAT TC<br>GTA TCC CAC CAA TGT AGC CG   | 267           | [7]       |
| <i>tet(M)</i> | Ribosomal protection | Tetracyclines                   | AGT GGA GCG ATT ACA GAA<br>CAT ATG TCC TGG CGT GTC TA      | 158           | [8]       |
| <i>tet(O)</i> | Ribosomal protection | Tetracyclines                   | AGC GTC AAA GGG GAA TCA CTA TCC<br>CGG CGG GGT TGG CAA ATA | 1723          | [9]       |
| <i>tet(Q)</i> | Ribosomal protection | Tetracyclines                   | TTA TAC TTC CTC CGG CAT CG<br>ATC GGT TCG AGA ATG TCC AC   | 904           | [7]       |
| <i>msrA</i>   | Efflux pump          | Macrolides/<br>streptogramins B | TCC AAT CAT AGC ACA AAA TC<br>AAT TCC CTC TAT TTG GTG GT   | 163           | [10]      |
| <i>mef</i>    | Efflux pump          | Macrolides                      | AGT ATC ATT AAT CAC TAG TGC<br>TTC TTC TGG TAC AAA AGT GG  | 348           | [10]      |

Table S1. Continuation.

| Marker        | Resistance Mechanism                           | Targeted antimicrobials | Sequence (5'-3')                                                       | Amplicon (bp) | Reference |
|---------------|------------------------------------------------|-------------------------|------------------------------------------------------------------------|---------------|-----------|
| <i>erm(A)</i> | Modified target site                           | MLS*                    | AAG CGG TAA ACC CCT CTG A<br>TTC GCA AAT CCC TTC TCA AC                | 190           | [8]       |
| <i>erm(B)</i> | Modified target site                           | MLS*                    | CTA TCT GAT TGT TGA AGA AGG ATT<br>GTT TAC TCT TGG TTT AGG ATG AAA     | 142           | [3]       |
| <i>erm(C)</i> | Modified target site                           | MLS*                    | AAT CGT CAA TTC CTG CAT GT<br>TAA TCG TGG AAT ACG GGT TTG              | 299           | [8]       |
| <i>ere(A)</i> | Enzymatic inactivation (erythromycin esterase) | Macrolides              | AAC ACC CTG AAC CCA AGG GAC G<br>CTT CAC ATC CGG ATT CGC TCG A         | 420           | [11]      |
| <i>ere(B)</i> | Enzymatic inactivation (erythromycin esterase) | Macrolides              | AGA AAT GGA GGT TCA TAC TTA CCA<br>CAT ATA ATC ATC ACC AAT GGC A       | 546           | [11]      |
| <i>qnrB</i>   | Target site protection                         | Quinolones              | GAT CGT GAA AGC CAG AAA GG<br>ATG AGC AAC GAT GCC TGG TA               | 476           | [12]      |
| <i>qnrS</i>   | Target site protection                         | Quinolones              | GCA AGT TCA TTG AAC AGG GT<br>TCT AAA CCG TCG AGT TCG GCG              | 428           | [12]      |
| <i>sul1</i>   | Modified target site                           | Sulphonamides           | ATG GTG ACG GTG TTC GGC ATT CTG A<br>CTA GGC ATG ATC TAA CCC TCG GTC T | 815           | [13]      |
| <i>sul2</i>   | Modified target site                           | Sulphonamides           | CCT GTT TCG TCC GAC ACA GA<br>GAA GCG CAG CCG CAA TTC AT               | 396           | [14]      |

\* Macrolides, lincosamides and streptogramins

Table S1. Continuation.

| Marker           | Resistance Mechanism                                               | Targeted antimicrobials | Sequence (5'-3')                                               | Amplicon (bp) | Reference |
|------------------|--------------------------------------------------------------------|-------------------------|----------------------------------------------------------------|---------------|-----------|
| <i>aacA-aphD</i> | Enzymatic inactivation (acetyltransferase)                         | Aminoglycosides         | TAA TCC AAG AGC AAT AAG GGC<br>GCC ACA CTA TCA TAA CCA CTA     | 227           | [8]       |
| <i>mexB</i>      | Efflux pump                                                        | **                      | GTG TTC GGC TCG CAG TAC TC<br>AAC CGT CGG GAT TGA CCT TG       | 244           | [15]      |
| <i>mexD</i>      | Efflux pump                                                        | **                      | CGA GCG CTA TTC GCT GC<br>GGC AGT TGC ACG TCG A                | 165           | [4]       |
| <i>mexF</i>      | Efflux pump                                                        | **                      | CGC CTG GTC ACC GAG GAA GAG T<br>TAG TCC ATG GCT TGC GGG AAG C | 255           | [16]      |
| <i>mexY</i>      | Efflux pump                                                        | **                      | CCG CTA CAA CGG CTA TCC CT<br>AGC GGG ATC GAC CAG CTT TC       | 250           | [15]      |
| <i>Int11</i>     | Integration of genetic cassettes that may contain resistance genes | Class 1 Integron        | GGT CAA GGA TCT GGA TTT CG<br>ACA TGC GTG TAA ATC ATC GTC      | 436           | [17]      |
| <i>Int12</i>     | Integration of genetic cassettes that may contain resistance genes | Class 2 Integron        | CAC GGA TAT GCG ACA AAA AGG<br>TGTA GCA AAC GAG TGA CGA AAT G  | 788           | [17]      |
| <i>Int13</i>     | Integration of genetic cassettes that may contain resistance genes | Class 3 Integron        | AGT GGG TGG CGA ATG AGT G<br>TGT TCT TGT ATC GGC AGG TG        | 600           | [17]      |

\*\* Efflux pumps that provide resistance to different antimicrobials

## References:

1. Jones, C. H.; Tuckman, M.; Keeney, D.; Ruzin, A.; Bradford, P. A.; Characterization and sequence analysis of extended-spectrum- $\beta$ -lactamase-encoding genes from *Escherichia coli*, *Klebsiella pneumoniae*, and *Proteus mirabilis* isolates collected during tigecycline phase 3 clinical trials. *Antimicrob. Agents Chemother.* **2009**, *53*, pp. 465–475.
2. Woodford, N.; Ellington, M. J.; Coelho, J. M.; Turton, J. F.; Ward, M. E.; Brown, S.; Amyes, S. G. B.; Livermore, D. M. Multiplex PCR for genes encoding prevalent OXA carbapenemases in *Acinetobacter* spp. *Int. J. Antimicrob. Agents.* **2006**, *27*, pp. 351–353.
3. Martineau, F.; Picard, F. J.; Lansac, N.; Ménard, C.; Roy, P. H.; Ouellette, M.; Bergeron, M. G. Correlation between the resistance genotype determined by multiplex PCR assays and the antibiotic susceptibility patterns of *Staphylococcus aureus* and *Staphylococcus epidermidis*. *Antimicrob. Agents Chemother.* **2000**, *44*, pp. 231–238.
4. Xavier, D. E.; Picão, R. C.; Girardello, R.; Fehlberg, L. C.; Gales, A. C. Efflux pumps expression and its association with porin down-regulation and  $\beta$ -lactamase production among *Pseudomonas aeruginosa* causing bloodstream infections in Brazil. *BMC Microbiol.* **2010**, *10*, pp. 217.
5. Gales, A. C.; Menezes, L. C.; Silbert, S.; Sader, H. S. Dissemination in distinct Brazilian regions of an epidemic carbapenem-resistant *Pseudomonas aeruginosa* producing SPM metallo- $\beta$ -lactamase. *J. Antimicrob. Chemother.* **2003**, *52*, pp. 699–702.
6. Zhang, K.; Sparling, J.; Chow, B. L.; Elsayed, S.; Hussain, Z.; Church, D. L.; Gregson, D. B.; Louie, T.; Conly, J. M. New quadriplex PCR assay for detection of methicillin and mupirocin resistance and simultaneous discrimination of *Staphylococcus aureus* from coagulase-negative Staphylococci. *J. Clin. Microbiol.* **2004**, *42*, pp. 4947–4955.
7. Ng, L. K.; Martin, I.; Alfa, M.; Mulvey, M. Multiplex PCR for the detection of tetracycline resistant genes. *Mol. Cell. Probes* **2001**, *15*, pp. 209–215.
8. Strommenger, B.; Kettlitz, C.; Werner, G.; Witte, W. Multiplex PCR assay for simultaneous detection of nine clinically relevant antibiotic resistance genes in *Staphylococcus aureus*. *J. Clin. Microbiol.* **2003**, *41*, pp. 4089–4094.
9. Trzcinski, K.; Cooper, B. S.; Hryniewicz, W.; Dowson, C. G. Expression of resistance to tetracyclines in strains of methicillin-resistant *Staphylococcus aureus*. *J. Antimicrob. Chemother.* **2000**, *45*, pp. 763–770.
10. Chaieb, K.; Zmantar, T.; Chehab, O.; Boucham, O.; Hasen, A. B.; Mahdouani, K., & Bakhrouf, A. et al. Antibiotic resistance genes detected by multiplex PCR assays in *Staphylococcus epidermidis* strains isolated from dialysis fluid and needles in a dialysis service. *Jpn J Infect Dis.* **2007**, *60*, pp. 183–187.
11. Sutcliffe, J.; Grebe, T.; Tait-Kamradt, A.; Wondrack, L. Detection of erythromycin-resistant determinants by PCR. *Antimicrob. Agents Chemother.* **1996**, *40*, pp. 2562–2566.
12. Kim, H. B.; Park, C. H.; Kim, C. J.; Kim, E.-C.; Jacoby, G. A.; Hooper, D. C. Prevalence of plasmid-mediated quinolone resistance determinants over a 9-year period. *Antimicrob. Agents Chemother.* **2009**, *53*, pp. 639–645.
13. Grape, M.; Sundström, L.; Kronvall, G. Sulphonamide resistance gene sul3 found in *Escherichia coli* isolates from human sources. *J. Antimicrob. Chemother.* **2003**, *52*, pp. 1022–1024.
14. Hindi, A. K.; Shubbar, E. E.; Addos, S. A. Molecular study on distribution of sul-1 and sul-2 genes among *Salmonella enterica* causing enteric fever. *Mag. Al-Kufa Univ. Biol.* **2013**, *5*, pp. 1–9.
15. Yoneda, K.; Chikumi, H.; Murata, T.; Gotoh, N.; Yamamoto, H.; Fujiwara, H.; Nishino, T.; Shimizu, E. Measurement of *Pseudomonas aeruginosa* multidrug efflux pumps by quantitative real-time polymerase chain reaction. *FEMS Microbiol. Lett.* **2005**, *243*, pp. 125–131.
16. El Amin, N.; Giske, C. G.; Jalal, S.; Keijsers, B.; Kronvall, G.; Wretling, B. Carbapenem resistance mechanisms in *Pseudomonas aeruginosa*: alterations of porin OprD and efflux proteins do not fully explain resistance patterns observed in clinical isolates. *APMIS* **2005**, *113*, pp. 187–196.

17. Machado, E.; Canton, R.; Baquero, F.; Galán, J-C.; Rollán, A.; Peixe, L.; Coque, T. M. Integron content of extended-spectrum- $\beta$ -lactamase-producing *Escherichia coli* strains over 12 years in a single hospital in Madrid, Spain. *Antimicrob. Agents Chemother.* **2005**, *49*, pp. 1823–1829.
